# Supplementary material
Source: PubMed Central journal article supplement (PMC2075169)
Supplement: tjp0581-0581-ts1.pdf [file tjp0581-0581-ts1.pdf]

**A**

Progression of **Delay** & **Variance**

|       | Conduction Delay |      |       |       | Synaptic Delay |      |       |       | Resp. Rise Delay |      |       |       | Transmission Delay |      |       |       |
|-------|------------------|------|-------|-------|----------------|------|-------|-------|------------------|------|-------|-------|--------------------|------|-------|-------|
|       | 20Hz             | 50Hz | 100Hz | 200Hz | 20Hz           | 50Hz | 100Hz | 200Hz | 20Hz             | 50Hz | 100Hz | 200Hz | 20Hz               | 50Hz | 100Hz | 200Hz |
| 20Hz  |                  | NS   | NS    | NS    |                | NS   | *     | *     |                  | *    | *     | *     |                    | NS   | *     | *     |
| 50Hz  | NS               |      | NS    | NS    | NS             |      | *     | *     | *                |      | *     | *     | *                  | NS   | *     | *     |
| 100Hz | NS               | NS   |       | NS    | NS             | NS   |       | *     | *                | *    |       | *     | *                  | *    |       | NS    |
| 200Hz | NS               | NS   | NS    |       |                | *    | *     |       | *                | *    | *     |       | *                  | *    | *     |       |

**B**

Percent Change in **Delay** & **Variance**

|       | Conduction Delay |      |       |       | Synaptic Delay |      |       |       | Resp. Rise Delay |      |       |       | Transmission Delay |      |       |       |
|-------|------------------|------|-------|-------|----------------|------|-------|-------|------------------|------|-------|-------|--------------------|------|-------|-------|
|       | 20Hz             | 50Hz | 100Hz | 200Hz | 20Hz           | 50Hz | 100Hz | 200Hz | 20Hz             | 50Hz | 100Hz | 200Hz | 20Hz               | 50Hz | 100Hz | 200Hz |
| 20Hz  |                  | NS   | NS    | NS    |                | NS   | *     | *     |                  | *    | *     | *     |                    | NS   | *     | *     |
| 50Hz  | NS               |      | NS    | NS    | NS             |      | *     | *     | *                |      | *     | *     | *                  | NS   | *     | *     |
| 100Hz | NS               | NS   |       | NS    | NS             | NS   |       | *     | *                | *    |       | *     | *                  | NS   | *     | *     |
| 200Hz | NS               | NS   | NS    |       |                | *    | *     |       | *                | *    | *     |       | *                  | *    | *     |       |

**C**

Progression of **Delay** & **Variance**

|       | Conduction Delay |     |      |       |     |       | Synaptic Delay |     |      |       |     |       | Resp. Rise Delay |     |      |       |     |       | Transmission Delay |     |      |       |     |       |   |
|-------|------------------|-----|------|-------|-----|-------|----------------|-----|------|-------|-----|-------|------------------|-----|------|-------|-----|-------|--------------------|-----|------|-------|-----|-------|---|
|       | 1mM              | 2mM | EGTA | Bacl. | 35C | 400Hz | 1mM            | 2mM | EGTA | Bacl. | 35C | 400Hz | 1mM              | 2mM | EGTA | Bacl. | 35C | 400Hz | 1mM                | 2mM | EGTA | Bacl. | 35C | 400Hz |   |
| 1mM   |                  | NS  | NS   | NS    | *   | *     |                |     | NS   | NS    | *   | NS    | *                | *   | NS   | NS    | *   | NS    | *                  | *   | NS   | NS    | *   | NS    | * |
| 2mM   | NS               |     | NS   | NS    | *   | *     | *              |     | NS   | NS    | *   | NS    | *                | *   | NS   | NS    | *   | NS    | *                  | *   | NS   | NS    | *   | NS    | * |
| EGTA  | NS               | NS  |      | NS    | *   | *     | NS             | *   |      | NS    | *   | NS    | *                | *   | NS   | NS    | *   | NS    | *                  | *   | NS   | NS    | *   | NS    | * |
| Bacl. | NS               | NS  | NS   |       | NS  | *     | *              | NS  | *    |       | NS  | *     | *                | *   | NS   | NS    | *   | NS    | *                  | *   | NS   | NS    | *   | NS    | * |
| 35C   | NS               | NS  | NS   | NS    |     | NS    | *              | *   | *    |       | NS  | *     | *                | *   | NS   | NS    | *   | NS    | *                  | *   | NS   | NS    | *   | NS    | * |
| 400Hz | NS               | NS  | NS   | NS    | NS  |       | NS             | *   | NS   | *     | *   |       | *                | *   | *    | *     | *   | *     | *                  | *   | *    | *     | *   | *     | * |

**D**

Percent Change in **Delay** & **Variance**

|       | Conduction Delay |     |      |       |     |       | Synaptic Delay |     |      |       |     |       | Resp. Rise Delay |     |      |       |     |       | Transmission Delay |     |      |       |     |       |   |
|-------|------------------|-----|------|-------|-----|-------|----------------|-----|------|-------|-----|-------|------------------|-----|------|-------|-----|-------|--------------------|-----|------|-------|-----|-------|---|
|       | 1mM              | 2mM | EGTA | Bacl. | 35C | 400Hz | 1mM            | 2mM | EGTA | Bacl. | 35C | 400Hz | 1mM              | 2mM | EGTA | Bacl. | 35C | 400Hz | 1mM                | 2mM | EGTA | Bacl. | 35C | 400Hz |   |
| 1mM   |                  | NS  | NS   | NS    | NS  | NS    |                |     | NS   | NS    | NS  | NS    | *                | *   | *    | NS    | NS  | NS    | *                  | *   | NS   | NS    | NS  | NS    | * |
| 2mM   | NS               |     | NS   | NS    | NS  | NS    | *              |     | NS   | NS    | NS  | NS    | *                | *   | *    | NS    | NS  | NS    | *                  | *   | NS   | NS    | NS  | NS    | * |
| EGTA  | NS               | NS  |      | NS    | NS  | NS    | NS             | *   |      | NS    | NS  | NS    | *                | *   | *    | NS    | NS  | NS    | *                  | *   | NS   | NS    | NS  | NS    | * |
| Bacl. | NS               | NS  | NS   |       | NS  | NS    | NS             | *   | *    | NS    | NS  | NS    | *                | *   | *    | NS    | NS  | NS    | *                  | *   | NS   | NS    | NS  | NS    | * |
| 35C   | NS               | NS  | NS   | NS    |     | NS    | NS             | *   | *    | NS    | NS  | NS    | *                | *   | *    | NS    | NS  | NS    | *                  | *   | NS   | NS    | NS  | NS    | * |
| 400Hz | NS               | NS  | NS   | NS    | NS  |       | NS             | *   | NS   | NS    | NS  | NS    | *                | *   | *    | *     | *   | *     | *                  | *   | *    | *     | *   | *     | * |

Fedchyshyn & Wang: Supplementary Tables 1  
For Publication
