# Supplementary material
Source: PubMed Central journal article supplement (PMC2075169)

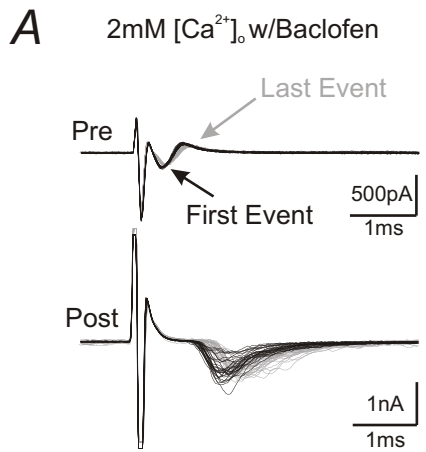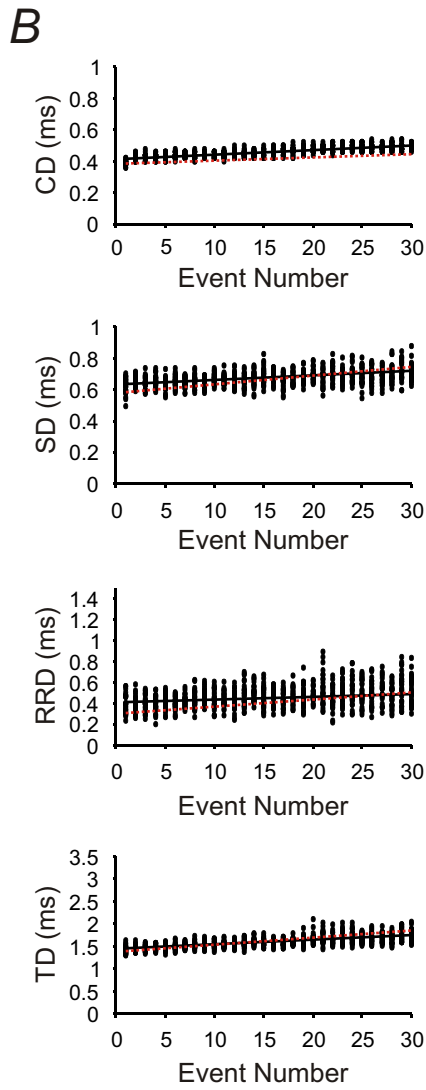

Fedchyshyn & Wang: Supplementary Figure 1  
For Publication

Supplement: tjp0581-0581-fs1.pdf [file tjp0581-0581-fs1.pdf]
